# Supplementary material for: Anterior gradient protein 2 expression in high grade head and neck squamous cell carcinoma correlated with cancer stem cell and epithelial mesenchymal transition
Source: PubMed Central journal article supplement (PMC4496185; doi:10.18632/oncotarget.3556), 2015-03-12
Supplement: oncotarget-06-8807-s001.pdf [file oncotarget-06-8807-s001.pdf]

## Anterior gradient protein 2 expression in high grade head and neck squamous cell carcinoma correlated with cancer stem cell and epithelial mesenchymal transition

### Supplementary Material

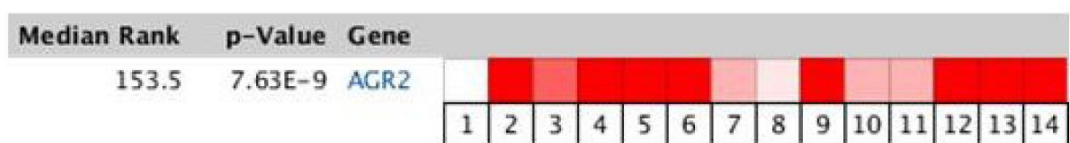

#### Legend

- |                                                                                                                                        |                                                                                                                                          |
|----------------------------------------------------------------------------------------------------------------------------------------|------------------------------------------------------------------------------------------------------------------------------------------|
| 1. Head and Neck Squamous Cell Carcinoma vs. Normal<br><i>Ginos Head-Neck, Cancer Res, 2004</i>                                        | 8. Head and Neck Squamous Cell Carcinoma Type: Oropharyngeal Squamous Cell Carcinoma<br><i>Rickman Head-Neck, Oncogene, 2008</i>         |
| 2. Barrett's Esophagus vs. Normal<br><i>Hao Esophagus, Gastroenterology, 2006</i>                                                      | 9. Prostate Carcinoma vs. Normal<br><i>Singh Prostate, Cancer Cell, 2002</i>                                                             |
| 3. Thyroid Gland Papillary Carcinoma vs. Normal<br><i>He Thyroid, Proc Natl Acad Sci U S A, 2005</i>                                   | 10. Head and Neck Squamous Cell Carcinoma Type: Hypopharyngeal Squamous Cell Carcinoma<br><i>Slebos Head-Neck, Clin Cancer Res, 2006</i> |
| 4. Ovarian Mucinous Adenocarcinoma vs. Normal<br><i>Hendrix Ovarian, Cancer Res, 2006</i>                                              | 11. Lung Adenocarcinoma vs. Normal<br><i>Stearman Lung, Am J Pathol, 2005</i>                                                            |
| 5. Pancreatic Adenocarcinoma vs. Normal<br><i>Iacobuzio-Donahue Pancreas 2, Am J Pathol, 2003</i>                                      | 12. Lung Adenocarcinoma vs. Normal<br><i>Su Lung, BMC Genomics, 2007</i>                                                                 |
| 6. Invasive Ductal Breast Carcinoma vs. Normal<br><i>Radvanyi Breast, Proc Natl Acad Sci U S A, 2005</i>                               | 13. Male Breast Carcinoma vs. Normal<br><i>TCGA Breast, No Associated Paper, 2011</i>                                                    |
| 7. Head and Neck Squamous Cell Carcinoma Type: Lip and Oral Cavity Squamous Cell Carcinoma<br><i>Rickman Head-Neck, Oncogene, 2008</i> | 14. Barrett's Esophagus vs. Normal<br><i>Wang Esophagus, Oncogene, 2006</i>                                                              |

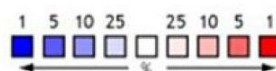

**Supplementary Figure S1: AGR2 expression in human head neck cancer.** Meta-analysis of recent gene expression profiling for *AGR2* where the colored squares indicated the median rank for *AGR2* across each analysis in various human cancer.

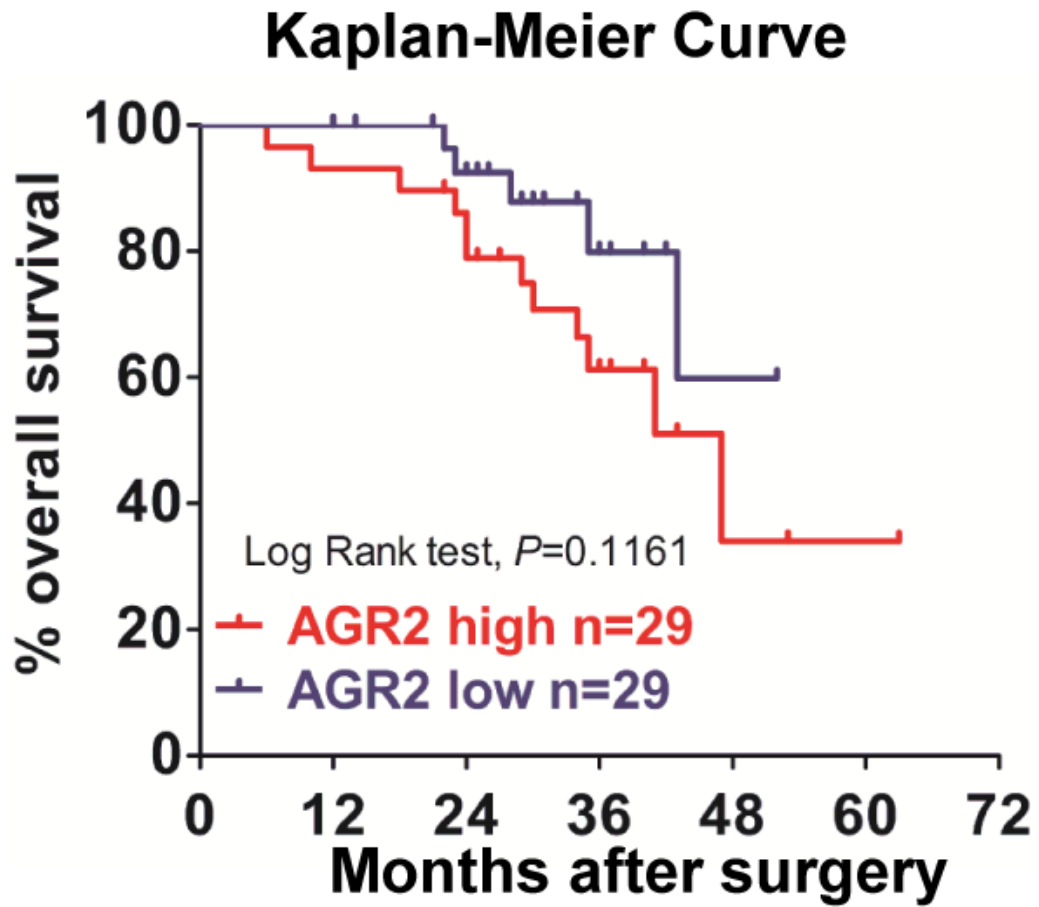

**Supplementary Figure S2: AGR2 expression of correlated with poor survival of human HNSCC.** Kaplan Meier curve showing head neck squamous cell carcinoma patient with low AGR2 expression (n=29) survival longer than AGR2 high expression patient, which log-Rank analysis reveal the difference was not significant (n=29,  $P>0.05$ ).

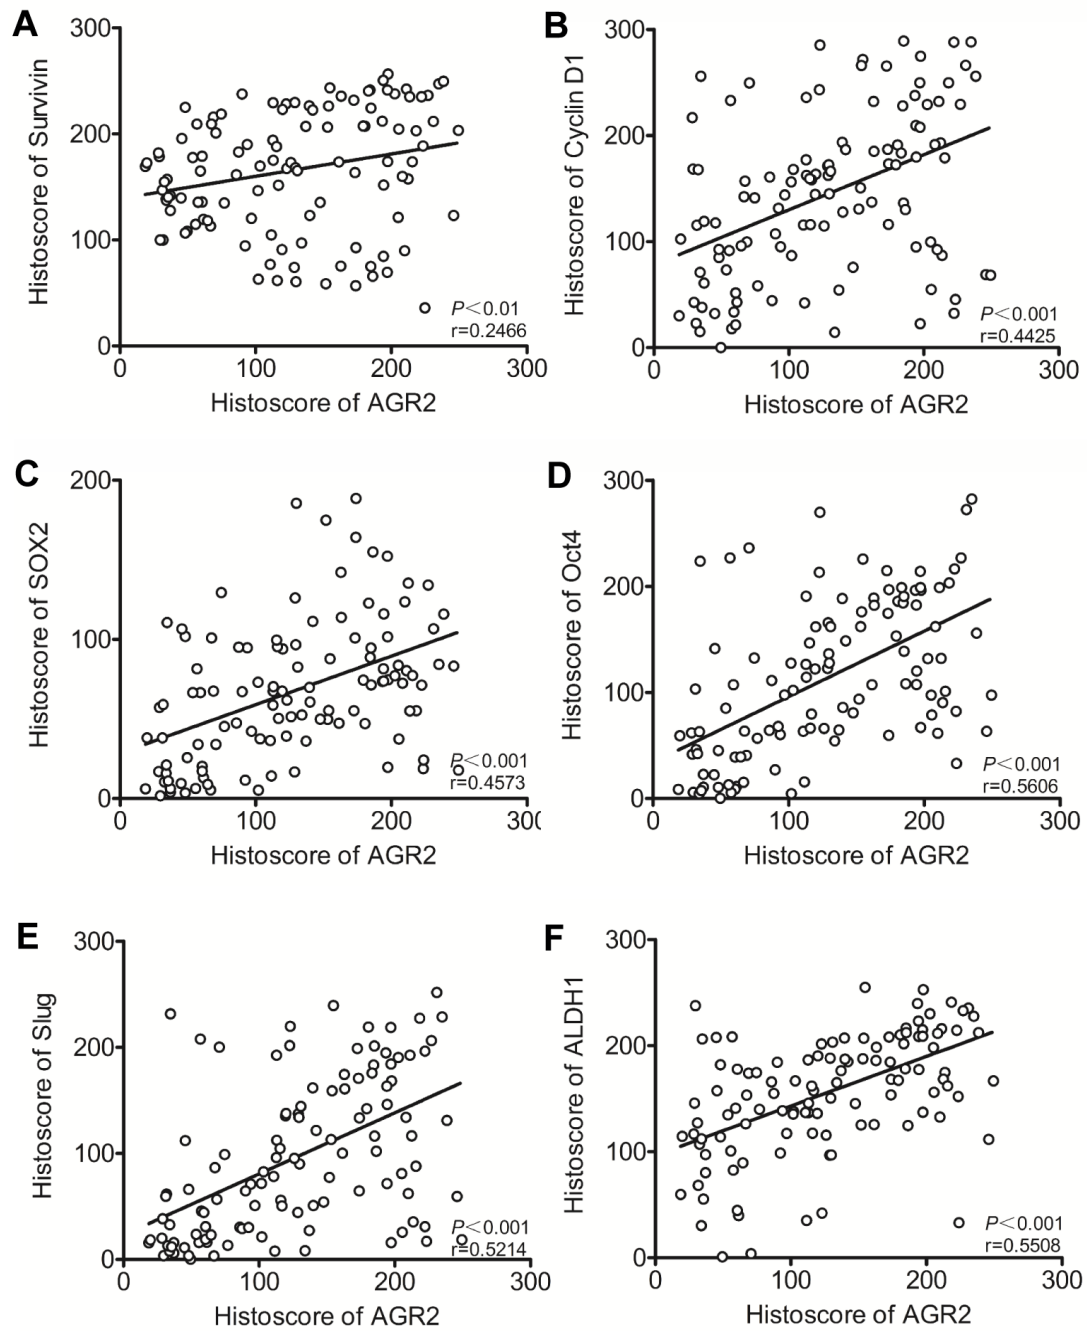

**Supplementary Figure S3: Quantification and correlation of AGR2 with Survivin, Cyclin D1,**

**ALDH1, Oct4, Sox2 and Slug in human HNSCC tissue.** Correlation of AGR2 with Survivin (A),

Cyclin D1 (B), Sox2 (C), Oct4 (D), Slug (E) and ALDH1 (F) in human HNSCC tissue array.

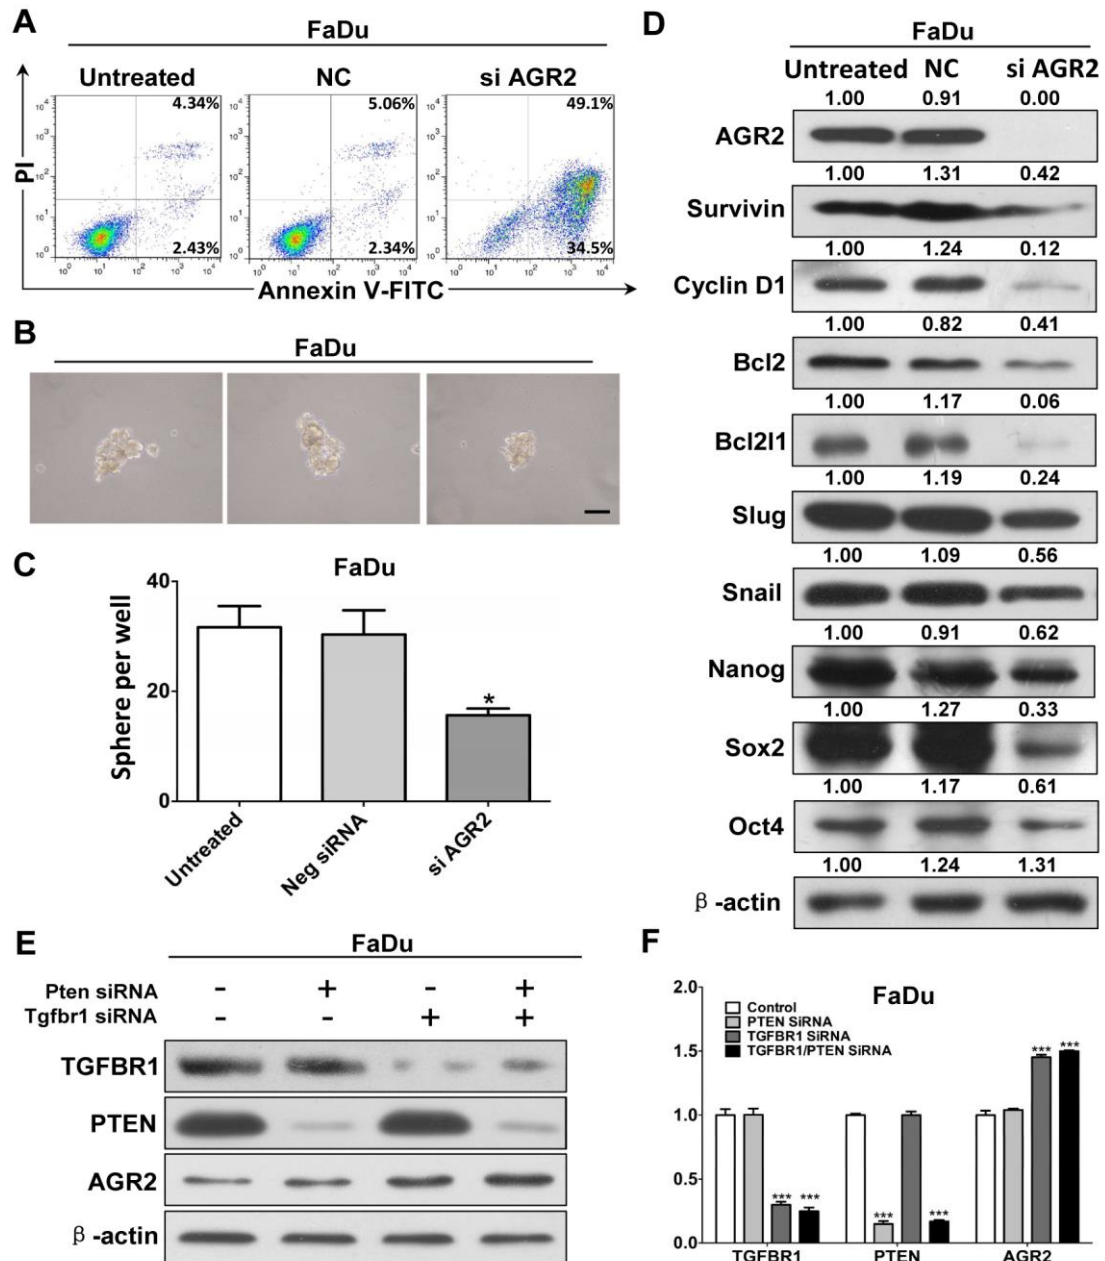

**Supplementary Figure S4: Knock down of AGR2 induces cell apoptosis and reduces colony formation in FaDu cell line.** (A) Annexin V-FITC/PI dual labeling assay showed AGR2 siRNA enhance apoptosis in FaDu cell lines by using flow cytometry; (B) Knock down of AGR2 in FaDu cell line reduced sphere formation with quantification in (C); Scale bar=100μm;(D) Western blot analysis revealed that the protein level of Survivin, Cyclin D1, Bcl2, Bcl2l1, Slug, Snail, Nanog, Sox2 and OCT4 were reduced in different degrees after AGR2 knock down in FaDu cell line for

48h. Quantification is performed using Image J by pixel analysis of band by normalized of  $\beta$ -actin as a loading control. Neg siRNA, negative siRNA, si *AGR2*, *AGR2* siRNA. (E) Western blot analysis of *AGR2* 48h after knocking down *PTEN*, *TGFBR1*, and combined *TGFBR1/PTEN* by using siRNA in FaDu cell line; (F) Quantitative analysis showed the protein level of *AGR2* in *TGFBR1* siRNA group and *TGFBR1/PTEN* combined siRNA group were significantly higher than the control group ( $P < 0.001$ ). Mean $\pm$ SEM, \*\*\*,  $P < 0.001$ .

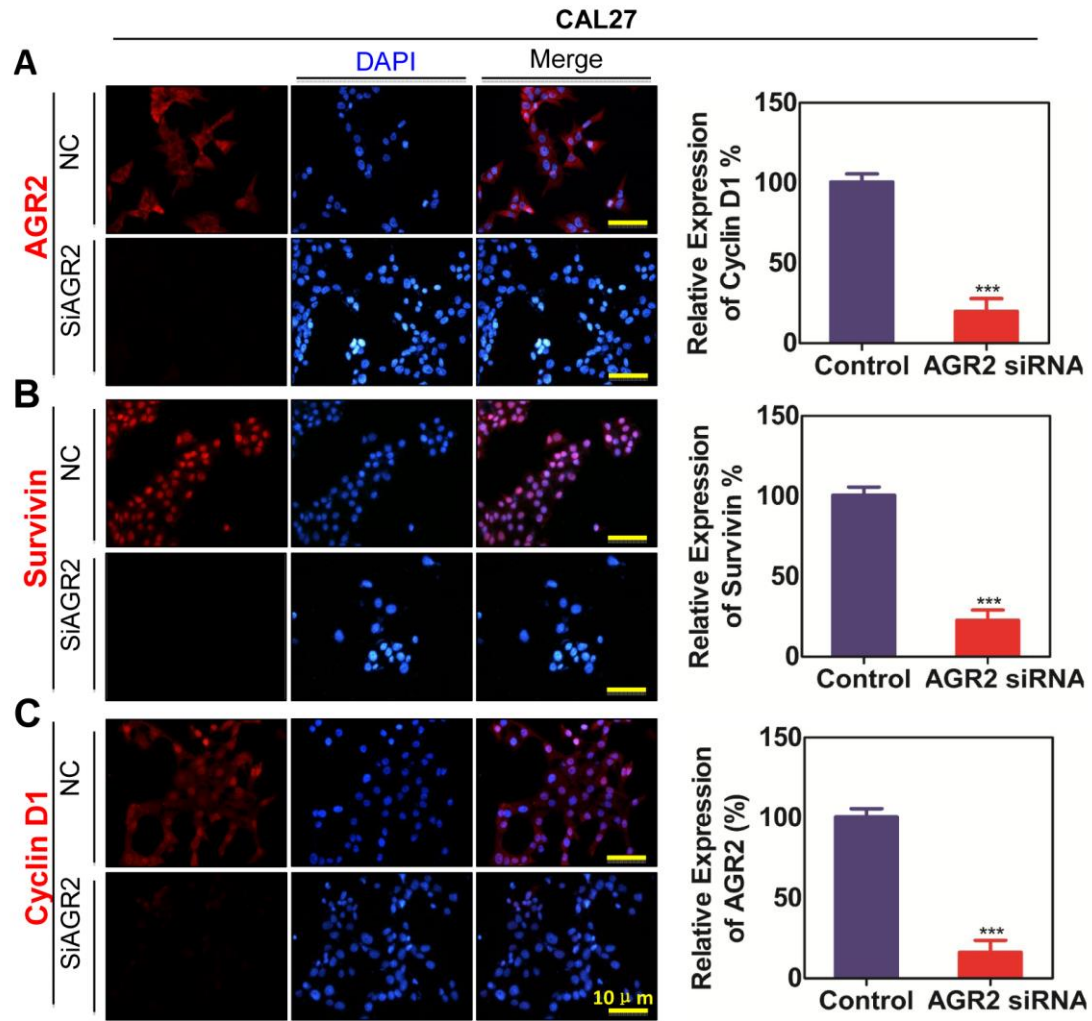

**Supplementary Figure S5: Immunofluorescence of AGR2 knock down reduce the expression of Survivin and Cyclin D1 in CAL27 cell line.** AGR2 siRNA significantly reduce the expression of AGR2 (A), Survivin (B) and Cyclin D1 (C) in CAL27 cell line ( $P < 0.001$ , respectively). \*\*\*,  $P < 0.001$ .

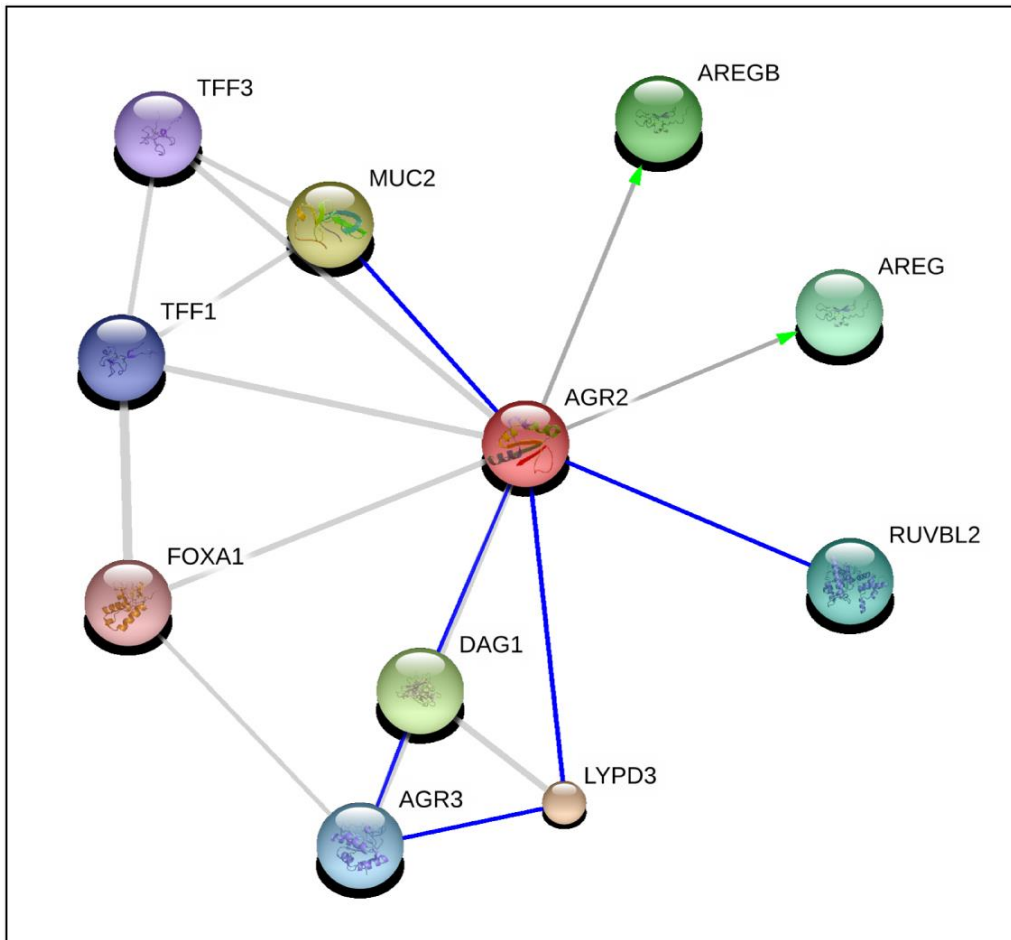

**Supplementary Figure S6: Predict protein interaction of AGR2.**

Computer predicts protein with direct protein-protein interaction with AGR2 analyzed by STRING database.

**Supplementary Table 1: Cinicopathological features of 59 oral squamous cell carcinoma used in this study.**

| <i>Case</i>     | <i>Location</i> | <i>Tumor(cm)</i> | <i>TNM</i> | <i>Grade</i> |
|-----------------|-----------------|------------------|------------|--------------|
| 1               | Tongue          | 3.0*2.0          | T2N0M0     | I            |
| 2               | Gingiva         | 2.0*1.5          | T1N1M0     | I            |
| 3               | Tongue          | 1.5*1.5          | T1N1M0     | I            |
| 4               | Tongue          | 2.0*2.0          | T2N0M0     | I            |
| 5               | Gingiva         | 3.0*2.0          | T2N0M0     | I            |
| 6               | Tongue          | 1.7*1.7          | T1N0M0     | I            |
| 7 <sup>†</sup>  | Tongue          | 3.0*1.5          | T2N1M0     | I            |
| 8               | Tongue          | 2.0*2.0          | T1N0M0     | I            |
| 9               | Gingiva         | 3.0*2.0          | T2N0M0     | I            |
| 10              | Buccal mucosa   | 3.0*2.0          | T2N1M0     | I            |
| 11              | Buccal mucosa   | 3.0*3.0          | T2N0M0     | II           |
| 12              | Buccal mucosa   | 4.0*3.0          | T3N1M0     | II           |
| 13              | Buccal mucosa   | 5.0*4.0          | T3N0M0     | II           |
| 14              | Tongue          | 3.0*2.0          | T2N1M0     | II           |
| 15              | Tongue          | 4.0*3.0          | T3N0M0     | II           |
| 16              | Tongue          | 5.0*4.0          | T3N0M0     | II           |
| 17              | Tongue          | 3.0*2.0          | T2N0M0     | II           |
| 18              | Tongue          | 3.0*2.0          | T2N1M0     | II           |
| 19              | Tongue          | 1.5*1.0          | T1N1M0     | II           |
| 20              | Tongue          | 3.0*2.0          | T2N1M0     | II           |
| 21 <sup>†</sup> | Tongue          | 3.0*2.0          | T2N1M0     | II           |
| 22              | Tongue          | 3.0*2.5          | T2N0M0     | II           |
| 23              | Tongue          | 4.0*2.0          | T3N0M0     | II           |
| 24              | Tongue          | 3.0*2.0          | T2N1M0     | II           |
| 25              | Oropharyngeal   | 3.0*3.0          | T2N0M0     | II           |
| 26              | Mouth floor     | 2.0*2.0          | T2N0M0     | II           |
| 27              | Gingiva         | 3.0*1.5          | T2N0M0     | III          |
| 28              | Buccal mucosa   | 4.0*3.0          | T3N1M0     | III          |
| 29              | Tongue          | 2.0*1.0          | T2N0M0     | III          |
| 30              | Buccal mucosa   | 3.0*2.5          | T2N1M0     | III          |
| 31              | Gingiva         | 3.0*2.5          | T2N0M0     | III          |
| 32              | Gingiva         | 3.0*2.0          | T2N0M0     | III          |
| 33 <sup>†</sup> | Tongue          | 5.0*3.0          | T3N1M0     | III          |
| 34              | Mouth floor     | 3.0*3.0          | T2N1M0     | III          |
| 35 <sup>†</sup> | Tongue          | 5.0*3.0          | T3N1M0     | III          |
| 36              | Tongue          | 5.0*4.0          | T3N0M0     | III          |
| 37              | Mouth floor     | 4.0*4.0          | T3N0M0     | III          |
| 38              | Tongue          | 2.5*1.5          | T2N0M0     | I            |
| 39              | Gingiva         | 3.0*1.5          | T2N0M0     | I            |



|                 |               |         |        |     |
|-----------------|---------------|---------|--------|-----|
| 40              | Tongue        | 1.5*1.5 | T1N0M0 | I   |
| 41              | Mouth floor   | 3.0*2.5 | T2N0M0 | I   |
| 42              | Gingiva       | 6.0*3.0 | T3N0M0 | I   |
| 43              | Gingiva       | 2.0*2.0 | T2N1M0 | I   |
| 44              | Gingiva       | 2.5*2.0 | T2N0M0 | II  |
| 45              | Palate        | 3.0*2.5 | T2N0M0 | II  |
| 46              | Mouth floor   | 2.0*2.0 | T1N0M0 | II  |
| 47 <sup>†</sup> | Mouth floor   | 2.5*1.5 | T2N1M0 | II  |
| 48              | Oropharyngeal | 4.0*2.0 | T2N0M0 | II  |
| 49              | Oropharyngeal | 4.0*3.0 | T2N0M0 | II  |
| 50              | Gingiva       | 3.0*3.0 | T2N0M0 | II  |
| 51              | Tongue        | 2.5*1.0 | T2N1M0 | III |
| 52              | Mouth floor   | 4.0*3.0 | T2N0M0 | III |
| 53              | Oropharyngeal | 4.0*3.0 | T2N0M0 | III |
| 54              | Palate        | 6.0*3.0 | T3N0M0 | III |
| 55              | Palate        | 6.0*3.0 | T3N0M0 | III |
| 56              | Gingiva       | 4.6*3.2 | T2N0M0 | III |
| 57              | Tongue        | 2.0*2.0 | T1N0M0 | III |
| 58              | Buccal mucosa | 3.0*3.0 | T2N1M0 | III |
| 59              | Tongue        | 1.0*1.0 | T1N0M0 | III |
| 60*             | Oropharyngeal | 2.5*2.0 |        |     |
| 61*             | Mouth floor   | 1.5*1.0 |        |     |
| 62*             | Oropharyngeal | 3.0*2.0 |        |     |
| 63*             | Gingiva       | 4.0*4.0 |        |     |
| 64*             | Mouth floor   | 5.0*3.0 |        |     |
| 65 <sup>#</sup> | Lip           | 2.5*2.0 |        |     |
| 66 <sup>#</sup> | Buccal mucosa | 3.0*2.5 |        |     |
| 67 <sup>#</sup> | Buccal mucosa | 3.7*3.2 |        |     |
| 68 <sup>#</sup> | Gingiva       | 4.0*4.0 |        |     |
| 69 <sup>#</sup> | Tongue        | 5.0*1.0 |        |     |
| 70 <sup>#</sup> | Gingiva       | 4.0*4.0 |        |     |
| 71 <sup>#</sup> | Buccal mucosa | 5.0*5.0 |        |     |
| 72 <sup>#</sup> | Tongue        | 2.0*2.0 |        |     |
| 73 <sup>#</sup> | Tongue        | 1.5*1.5 |        |     |
| 74 <sup>#</sup> | Buccal mucosa | 4.0*3.0 |        |     |
| 75 <sup>#</sup> | Tongue        | 2.0*2.0 |        |     |
| 76 <sup>#</sup> | Gingiva       | 3.0*3.0 |        |     |

<sup>†</sup>Specimen including original tumor as well as metastatic lymph nodes

\* Recurrence after radiotherapy or radiotherapy before surgery

<sup>#</sup> Specimen including biopsy as well as surgical removal specimen after TPF chemotherapy

**Supplementary Table 2: Pearson correlation coefficient test analyses of the array immunostainings of AGR2, Survivin, Cyclin D1, ALDH1, Sox2, Oct4 and Slug in OSCC (n=111).**

| Markers   | AGR2 | Survivin           | Cyclin D1          | ALDH1              | Sox2               | Oct4               | Slug               |
|-----------|------|--------------------|--------------------|--------------------|--------------------|--------------------|--------------------|
| AGR2      |      | P<0.001<br>r=0.246 | P<0.001<br>r=0.442 | P<0.001<br>r=0.521 | P<0.001<br>r=0.551 | P<0.001<br>r=0.561 | P<0.001<br>r=0.457 |
| Survivin  |      |                    | P<0.001<br>r=0.452 | P<0.001<br>r=0.460 | P<0.001<br>r=0.459 | P<0.001<br>r=0.478 |                    |
| Cyclin D1 |      |                    |                    | P<0.001<br>r=0.846 | P<0.001<br>r=0.529 | P<0.001<br>r=0.829 | P<0.001<br>r=0.417 |
| ALDH1     |      |                    |                    |                    | P<0.001<br>r=0.574 | P<0.001<br>r=0.931 | P<0.001<br>r=0.536 |
| Sox2      |      |                    |                    |                    |                    | P<0.001<br>r=0.579 | P<0.001<br>r=0.379 |
| Oct4      |      |                    |                    |                    |                    |                    | P<0.001<br>r=0.531 |
